# Supplementary material for: Quantifying economic risks to dairy farms from volcanic hazards in Taranaki, Aotearoa / New Zealand
Source: Copernicus journal article supplement (doi:10.5194/nhess-25-1543-2025), 2025-04-29
Supplement: Supplementary file 1 [file nhess-25-1543-2025-supplement.zip]

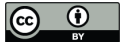

*Supplement of*

## **Quantifying economic risks to dairy farms from volcanic hazards in Taranaki, Aotearoa / New Zealand**

**Nicola J. McDonald et al.**

*Correspondence to:* Nicola J. McDonald (nicky@me.co.nz)

- nhess-25-1543-2025-supplement-title-page.pdf
- Supplementary Data - Impact Scalars.xlsx

The copyright of individual parts of the supplement might differ from the article licence.
