# Supplementary material for: Quantifying economic risks to dairy farms from volcanic hazards in Taranaki, Aotearoa / New Zealand
Source: Copernicus journal article supplement (doi:10.5194/nhess-25-1543-2025), 2025-04-29
Supplement: Supplementary file 1 [file nhess-25-1543-2025-supplement.zip]

## Sheet: Impact State Scalars
		Impact Scalars by Farm, Combined Impact State and Expenditure/Revenue Category
					Farm No	1	1	1	1	1	2	2	2	2	2	3	3	3	3	3	4	4	4	4	4	5	5	5	5	5	1	1	1	2	2	2	3	3	3	4	4	4	5	5	5	1	1	1	1
					Combined Impact State	IS0	IS1A	IS2A	IS3A	IS4	IS0	IS1A	IS2A	IS3A	IS4	IS0	IS1A	IS2A	IS3A	IS4	IS0	IS1A	IS2A	IS3A	IS4	IS0	IS1A	IS2A	IS3A	IS4	IS1T	IS2T	IS3T	IS1T	IS2T	IS3T	IS1T	IS2T	IS3T	IS1T	IS2T	IS3T	IS1T	IS2T	IS3T	IS1AIS2T	IS2AIS2T	IS2AIS3T	IS3AIS2T
			Revenue	Stock	Net milk sales	1	0.9	0.675	0.3	0	1	0.9	0.675	0.3	0	1	0.9	0.675	0.3	0	1	0.9	0.675	0.3	0	1	0.9	0.675	0.3	0	1	0	0.2	1	0	0.2	1	0	0.2	1	0	0.2	1	0	0.2	0.855	0.64125	0.14	0.25
			Revenue	Stock	Net livestock sales	1	0.9	0.675	0.3	0	1	0.9	0.675	0.3	0	1	0.9	0.675	0.3	0	1	0.9	0.675	0.3	0	1	0.9	0.675	0.3	0	1	0	0.85	1	0	0.75	1	0	0.85	1	0	0.85	1	0	0.91	0.855	0.64125	0.595	0.25
			Revenue	Crop and Feed	Capital value change	1	1	1	1	0	1	1	1	1	0	1	1	1	1	0	1	1	1	1	0	1	1	1	1	0	1	1	1	1	1	1	1	1	1	1	1	1	1	1	1	1	1	1	1
			Expenses	Wages	Wages	1	1	1	0.3	0	1	1	1	0.3	0	1	1	1	0.3	0	1	1	1	0.3	0	1	1	1	0.3	0	1	1	1	1	1	1	1	1	1	1	1	1	1	1	1	1	1	1	0.3
			Expenses	Wages	Management wage	1	1	1	1	0	1	1	1	1	0	1	1	1	1	0	1	1	1	1	0	1	1	1	1	0	1	1	1	1	1	1	1	1	1	1	1	1	1	1	1	1	1	1	1
			Expenses	Stock	Bedding	1	1	1	1	0	1	1	1	1	0	1	1	1	1	0	1	1	1	1	0	1	1	1	1	0	1	1	1	1	1	1	1	1	1	1	1	1	1	1	1	1	1	1	1
			Expenses	Stock	Animal health	1	1	2	4	0	1	1	2	4	0	1	1	2	4	0	1	1	2	4	0	1	1	2	4	0	1	1	1	1	1	1	1	1	1	1	1	1	1	1	1	1	2	2	4
			Expenses	Stock	Breeding	1	1	1	0.3	0	1	1	1	0.3	0	1	1	1	0.3	0	1	1	1	0.3	0	1	1	1	0.3	0	1	1	1	1	1	1	1	1	1	1	1	1	1	1	1	1	1	1	0.3
			Expenses	Stock	Farm Dairy	1	1	1	0.5	0	1	1	1	0.5	0	1	1	1	0.5	0	1	1	1	0.5	0	1	1	1	0.5	0	1	1	1	1	1	1	1	1	1	1	1	1	1	1	1	1	1	1	0.5
			Expenses	Stock	Electricity	1	1	1	0.5	0	1	1	1	0.5	0	1	1	1	0.5	0	1	1	1	0.5	0	1	1	1	0.5	0	1	1	1	1	1	1	1	1	1	1	1	1	1	1	1	1	1	1	0.5
			Expenses	Feed/Crop	Pasture conserved	1	1	1	0.3	0	1	1	1	0.3	0	1	1	1	0.3	0	1	1	1	0.3	0	1	1	1	0.3	0	1	1	1	1	1	1	1	1	1	1	1	1	1	1	1	1	1	1	0.3
			Expenses	Feed/Crop	Feed Crop	1	1	1	0	0	1	1	1	0	0	1	1	1	0	0	1	1	1	0	0	1	1	1	0	0	1	1	1	1	1	1	1	1	1	1	1	1	1	1	1	1	1	1	0
			Expenses	Feed/Crop	Bought Feed	1	2.13333	2.5	2.38333	0	1	1.6	1.7	1.45	0	1	2.13333	2.5	2.38333	0	1	2.13333	2.5	2.38333	0	1	3.02222	3.83333	3.93889	0	1	1	1	1	1	1	1	1	1	1	1	1	1	1	1	2.13333	2.23333	1	1.71667
			Expenses	Feed/Crop	Calf Feed	1	1	1	0.3	0	1	1	1	0.3	0	1	1	1	0.3	0	1	1	1	0.3	0	1	1	1	0.3	0	1	1	1	1	1	1	1	1	1	1	1	1	1	1	1	1	1	1	0.3
			Expenses	Grazing	Grazing	1	2.13333	2.5	2.38333	0	1	1.6	1.7	1.45	0	1	2.13333	2.5	2.38333	0	1	2.13333	2.5	2.38333	0	1	3.02222	3.83333	3.93889	0	1	1	1	1	1	1	1	1	1	1	1	1	1	1	1	2.13333	2.23333	1	1.71667
			Expenses	Other Farm Working	Fertiliser (excl N)	1	1	1	1	0	1	1	1	1	0	1	1	1	1	0	1	1	1	1	0	1	1	1	1	0	1	1	1	1	1	1	1	1	1	1	1	1	1	1	1	1	1	1	1
			Expenses	Other Farm Working	Nitrogen	1	1	1	0.3	0	1	1	1	0.3	0	1	1	1	0.3	0	1	1	1	0.3	0	1	1	1	0.3	0	1	1	1	1	1	1	1	1	1	1	1	1	1	1	1	1	1	1	0.3
			Expenses	Other Farm Working	Regrassing	1	1	1	1	0	1	1	1	1	0	1	1	1	1	0	1	1	1	1	0	1	1	1	1	0	1	1	1	1	1	1	1	1	1	1	1	1	1	1	1	1	1	1	1
			Expenses	Other Farm Working	Weed and pest control	1	1	1	1	0	1	1	1	1	0	1	1	1	1	0	1	1	1	1	0	1	1	1	1	0	1	1	1	1	1	1	1	1	1	1	1	1	1	1	1	1	1	1	1
			Expenses	Other Farm Working	Vehicle expenses	1	1	1	1	0	1	1	1	1	0	1	1	1	1	0	1	1	1	1	0	1	1	1	1	0	1	1	1	1	1	1	1	1	1	1	1	1	1	1	1	1	1	1	1
			Expenses	Other Farm Working	Fuel	1	1	1	1	0	1	1	1	1	0	1	1	1	1	0	1	1	1	1	0	1	1	1	1	0	1	1	1	1	1	1	1	1	1	1	1	1	1	1	1	1	1	1	1
			Expenses	Other Farm Working	Vehicle and fuel expense	1	1	1	1	0	1	1	1	1	0	1	1	1	1	0	1	1	1	1	0	1	1	1	1	0	1	1	1	1	1	1	1	1	1	1	1	1	1	1	1	1	1	1	1
			Expenses	Other Farm Working	R&M Land/Buildings	1	1	1	1	0	1	1	1	1	0	1	1	1	1	0	1	1	1	1	0	1	1	1	1	0	1	1	1	1	1	1	1	1	1	1	1	1	1	1	1	1	1	1	1
			Expenses	Other Farm Working	R&M Plant/Equiment	1	1	1	1	0	1	1	1	1	0	1	1	1	1	0	1	1	1	1	0	1	1	1	1	0	1	1	1	1	1	1	1	1	1	1	1	1	1	1	1	1	1	1	1
			Expenses	Other Farm Working	Freight & Cartage	1	2.13333	2.5	2.38333	0	1	2.13333	2.5	2.38333	0	1	2.13333	2.5	2.38333	0	1	2.13333	2.5	2.38333	0	1	2.13333	2.5	2.38333	0	3	1	1	3	1	1	3	1	1	3	1	1	3	1	1	2.13333	2.23333	1	1.71667
			Expenses	Overheads	Administration expense	1	1	1	1	0	1	1	1	1	0	1	1	1	1	0	1	1	1	1	0	1	1	1	1	0	1	1	1	1	1	1	1	1	1	1	1	1	1	1	1	1	1	1	1
			Expenses	Overheads	Insurance	1	1	1	1	0	1	1	1	1	0	1	1	1	1	0	1	1	1	1	0	1	1	1	1	0	1	1	1	1	1	1	1	1	1	1	1	1	1	1	1	1	1	1	1
			Expenses	Overheads	ACC levies	1	1	1	1	0	1	1	1	1	0	1	1	1	1	0	1	1	1	1	0	1	1	1	1	0	1	1	1	1	1	1	1	1	1	1	1	1	1	1	1	1	1	1	1
			Expenses	Overheads	Rates	1	1	1	1	1	1	1	1	1	1	1	1	1	1	1	1	1	1	1	1	1	1	1	1	1	1	1	1	1	1	1	1	1	1	1	1	1	1	1	1	1	1	1	1
[truncated: 21 more columns]
